# Supplementary material for: Controllable Preparation of Eucommia Wood-Derived Mesoporous Activated Carbon as Electrode Materials for Supercapacitors
Source: MDPI journal article supplement (doi:10.3390/polym15030663), 2023-01-28
Supplement: s1 [file s1]

# Controllable Preparation of Eucommia Wood-Derived Mesoporous Activated Carbon as Electrode Materials for Supercapacitors

Hongyu Su <sup>1,2</sup>, Caining Lan <sup>1,2</sup>, Zhouping Wang <sup>3</sup>, Lin Zhu <sup>1,2</sup> and Mingqiang Zhu <sup>1,2,\*</sup>

<sup>1</sup> College of Mechanical and Electronic Engineering, Northwest A&F University, Yangling 712100, China

<sup>2</sup> Northwest Research Center of Rural Renewable Energy Exploitation and Utilization of M.O.A, Northwest A&F University, Yangling 712100, China

<sup>3</sup> Horticultural Technology Station of Shaanxi, Xi'an 710003, China

\* Correspondence: zmqsx@nwsuaf.edu.cn; Fax: +86-29-87092269

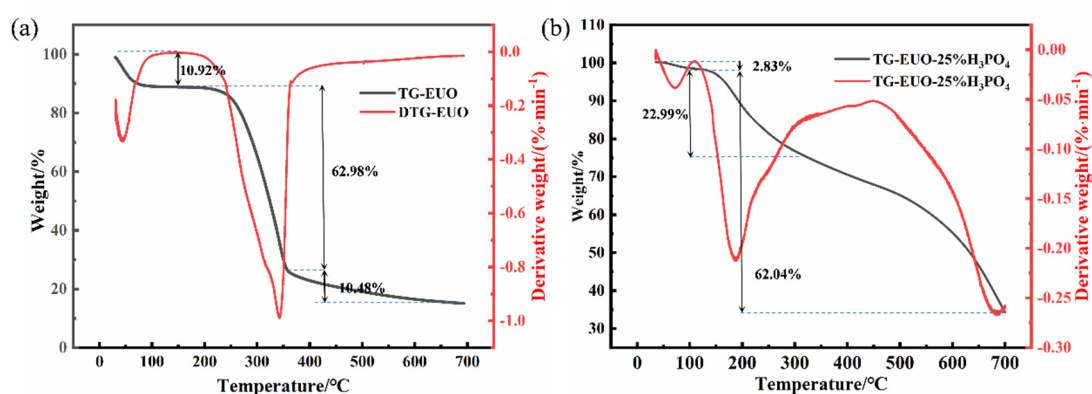

**Figure S1.** (a): TGA and DTG of the EUO-wood; (b) TGA and DTG of the EUO-wood infiltrated by phosphoric acid.

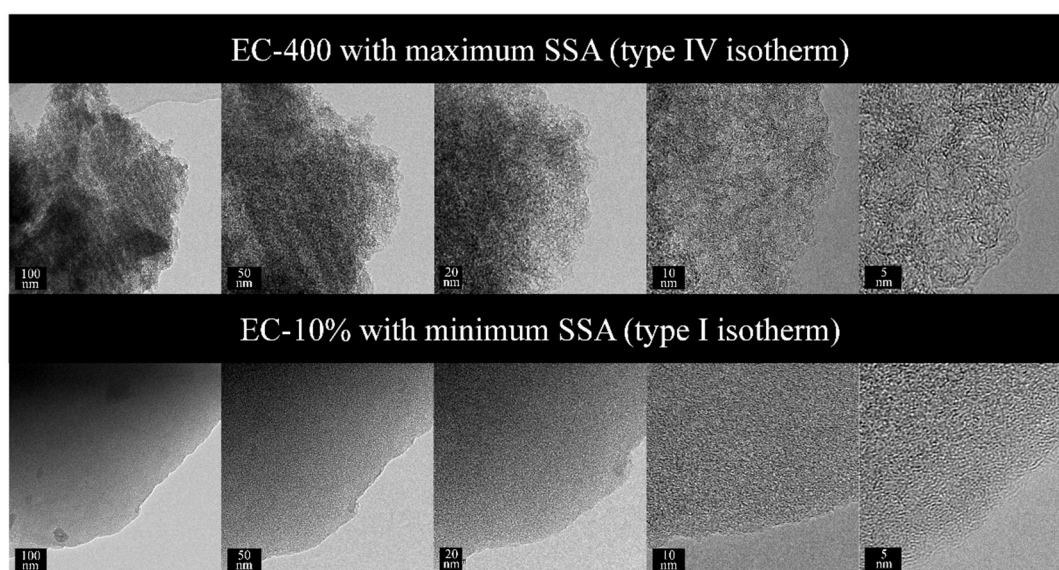

**Figure S2.** TEM images of EC-400 and EC-10%.

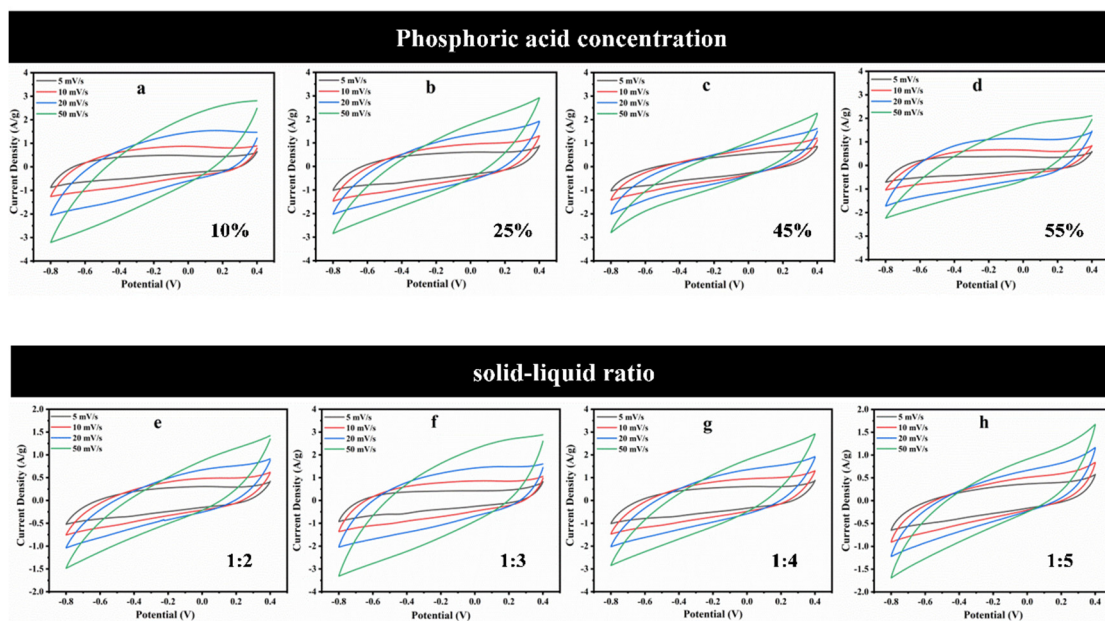

**Figure S3.** The CV curves of ECs at different scanning rates (phosphoric acid concentration and solid-liquid ratio).

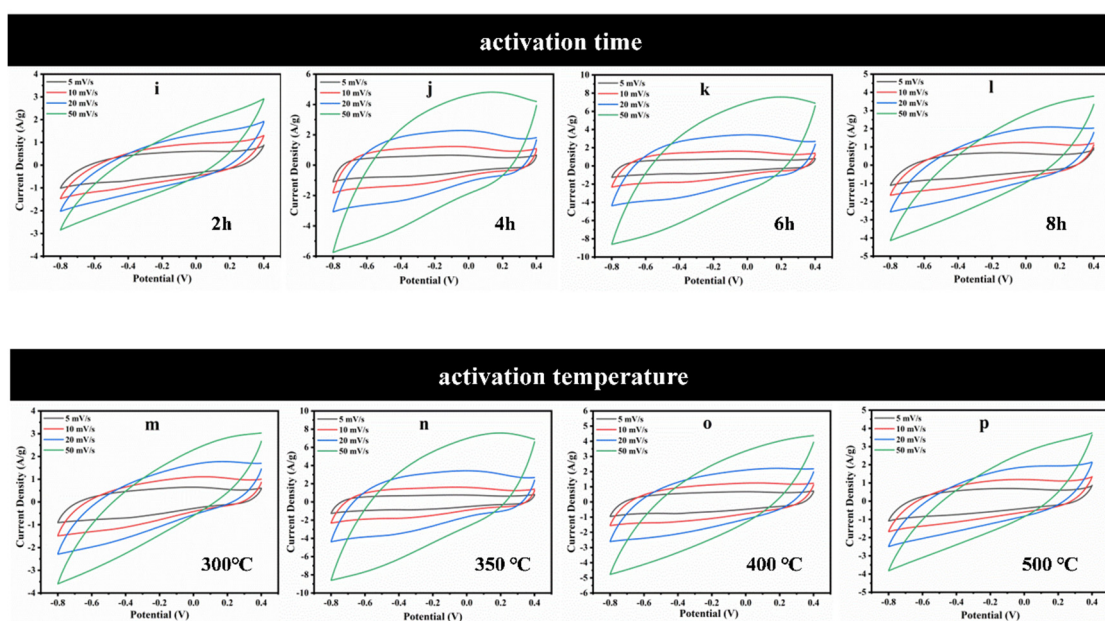

**Figure S4.** The CV curves of ECs at different scanning rates (activation time and activation temperature).

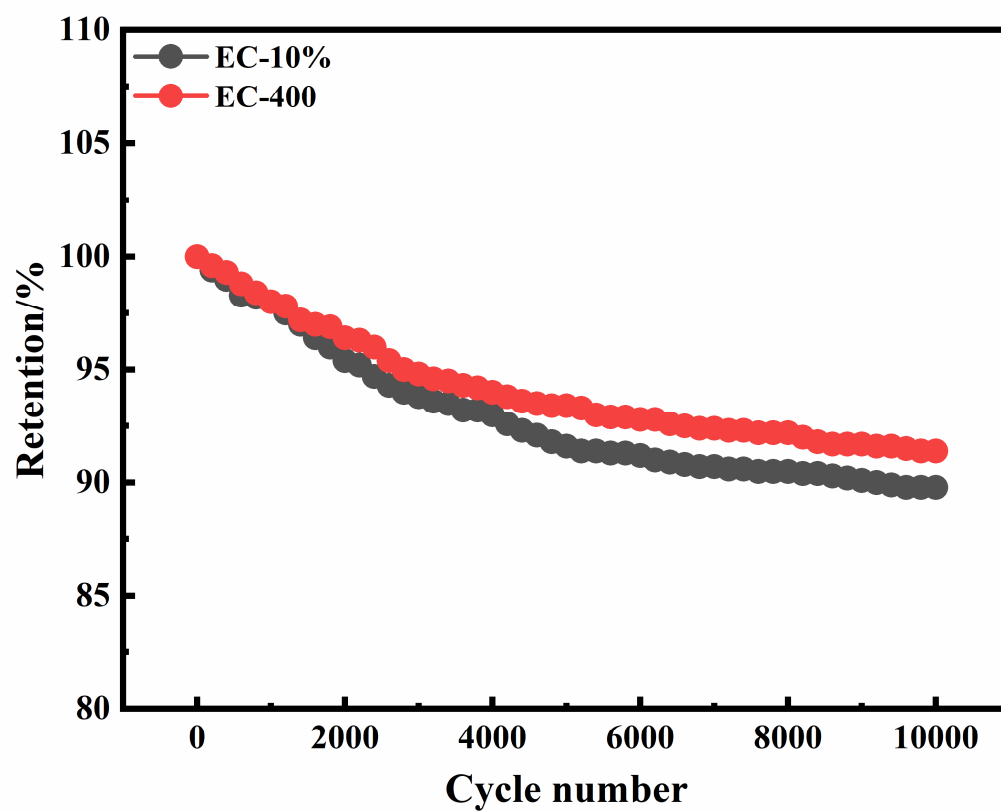

Figure S5. Cyclic stability recorded for EC-10% and EC-400.

**Table S1: The specific capacitance of ECs at different current density.**

| Sample | Specific capacitance/(F • g <sup>-1</sup> ) |                          |                          |                          | Capacitance Retention/% |
|--------|---------------------------------------------|--------------------------|--------------------------|--------------------------|-------------------------|
|        | 0.2/(A•g <sup>-1</sup> )                    | 0.5/(A•g <sup>-1</sup> ) | 0.8/(A•g <sup>-1</sup> ) | 1.2/(A•g <sup>-1</sup> ) |                         |
| EC-10% | 153.7                                       | 148.0                    | 134.9                    | 112.8                    | 73.4%                   |
| EC-25% | 194.6                                       | 181.1                    | 166.4                    | 148.5                    | 76.3%                   |
| EC-40% | 178.4                                       | 169.3                    | 145.5                    | 135.0                    | 75.7%                   |
| EC-55% | 171.1                                       | 157.9                    | 144.6                    | 134.1                    | 78.4%                   |
| EC-1:2 | 148.3                                       | 125.2                    | 109.9                    | 101.3                    | 68.3%                   |
| EC-1:3 | 177.5                                       | 167.0                    | 150.1                    | 135.4                    | 76.2%                   |
| EC-1:4 | 194.6                                       | 181.1                    | 166.4                    | 139.9                    | 76.3%                   |
| EC-1:5 | 171.4                                       | 160.6                    | 140.0                    | 126.0                    | 73.5%                   |
| EC-2h  | 194.6                                       | 181.1                    | 166.4                    | 139.9                    | 76.3%                   |
| EC-4h  | 226.7                                       | 211.4                    | 185.3                    | 177.3                    | 78.2%                   |
| EC-6h  | 257.8                                       | 247.5                    | 220.2                    | 208.7                    | 81.0%                   |
| EC-8h  | 171.7                                       | 161.3                    | 155.4                    | 141.3                    | 82.3%                   |
| EC-350 | 186.5                                       | 171.0                    | 164.4                    | 147.5                    | 79.1%                   |
| EC-400 | 257.8                                       | 247.5                    | 220.2                    | 208.7                    | 81.0%                   |
| EC-450 | 238.2                                       | 227.7                    | 210.0                    | 198.7                    | 83.4%                   |
| EC-500 | 210.0                                       | 194.3                    | 185.5                    | 171.6                    | 81.7%                   |

Table S2 Comparison of activated carbons prepared from different biomass for Supercapacitor application

| Starting materials               | Activation condition           |        | Physical Characteristics             |                        | Electrochemical Characteristics |                       |                | Electrolyte                         | Ref                             |
|----------------------------------|--------------------------------|--------|--------------------------------------|------------------------|---------------------------------|-----------------------|----------------|-------------------------------------|---------------------------------|
|                                  | a                              | b (°C) | S <sub>BET</sub> (m <sup>2</sup> /g) | c (cm <sup>3</sup> /g) | d (Fg <sup>-1</sup> )           | e (Ag <sup>-1</sup> ) | f              |                                     |                                 |
| Soya Beans                       | KOH                            | 700    | 1208                                 | -                      | 149                             | 0.5                   | 89.3% in 5000  | KOH/PVA                             | Chen et al. 2019 [1]            |
| Binata                           | KOH                            | 852    | 2273                                 | 1.19                   | 373                             | 0.5                   | 94.6% in 10000 | 6 M KOH                             | Liu et al. 2016 [2]             |
| Tree bark                        | KOH                            | 800    | 1018                                 | 0.67                   | 191                             | 1                     | 100% in 5000   | Na <sub>2</sub> SO <sub>4</sub>     | Momodu et al. 2017 [3]          |
| Brussel                          | KOH                            | 900    | 2267                                 | 1.32                   | 255                             | 0.5                   | 99.55% in 5000 | 6 M KOH                             | Li et al. 2016 [4]              |
| Rotten carrot                    | ZnCl <sub>2</sub>              | 700    | 1253                                 | 0.95                   | 137                             | 1                     | -              | 6 M KOH                             | Ahmed et al. 2018 [5]           |
| Cottonseed meal                  | K <sub>2</sub> CO <sub>3</sub> | 800    | 2361                                 | 1.41                   | 313.4                           | 0.1                   | 86.4% in 20000 | 6 M KOH                             | Jia et al. 2022 [6]             |
| Tamarindus indica<br>Fruit Shell | H <sub>3</sub> PO <sub>4</sub> | 900    | 846                                  | 0.556                  | 287                             | 1                     | 92.5% in 5000  | 1 M KOH                             | Sivachidambaram et al. 2018 [7] |
| Baobab shell                     | H <sub>3</sub> PO <sub>4</sub> | 800    | 911                                  | 0.47                   | 355                             | 1                     | 99.7% in 5000  | 4 M KOH                             | Mohammed et al. 2019 [8]        |
| Olive residue                    | H <sub>3</sub> PO <sub>4</sub> | 840    | 1390                                 | 0.61                   | 150                             | 0.25                  | 91% in 12500   | 1 M Na <sub>2</sub> SO <sub>4</sub> | Ma 2017 [9]                     |
| EUO (EC-400)                     | H <sub>3</sub> PO <sub>4</sub> | 400    | 2033.87                              | 1.11                   | 252                             | 0.2                   | 91.4% in 10000 | 1 M H <sub>2</sub> SO <sub>4</sub>  | This study                      |

a) Activation agent, b) Activation temperature, S<sub>BET</sub>) Brunauer-Emmett-Teller surface area, c) Total pore volume, d) Specific capacitance, e) Current density, f) Stabili

## References

1. Chen, M.; Yu, D.; Zheng, X.; Dong, X. Biomass based N-doped hierarchical porous carbon nanosheets for all-solid-state supercapacitors. *J. Energy Storage* **2019**, *21*, 105-112.
2. Liu, B.; Chen, H.; Gao, Y.; Li, H. Preparation and capacitive performance of porous carbon materials derived from eulaliopsis binata. *Electrochem. Acta* **2016**, *189*, 93-100.
3. Momodu, D.; Madito, M.; Barzegar, F.; Bello, A.; Khaleed, A.; Olaniyan, O.; Dangbegnon, J. Manyala, N. Activated carbon derived from tree bark biomass with promising material properties for supercapacitors. *J. Solid State Electrochem.* **2017**, *21*, 859-872.
4. Li, J.; Zan, G.; Wu, Q. Nitrogen and sulfur self-doped porous carbon from brussel sprouts as electrode materials for high stable supercapacitors. *RSC Adv.* **2016**, *6*, 57464-57472.
5. Ahmed, S.; Ahmed, A.; Rafat, M. Supercapacitor performance of activated carbon derived from rotten carrot in aqueous, organic and ionic liquid based electrolytes. *J. Saudi Chem. Soc.* **2018**, *22*, 993-1002.
6. Jia, B.; Mian, Q.; Wu, D.; Wang, T. Heteroatoms self-doped porous carbon from cottonseed meal using  $K_2CO_3$  as activator and DES electrolyte for supercapacitor with high energy density. *Materials Today Chem.* **2022**, *24*.
7. Sivachidambaram, M.; Vijaya, J.J.; Niketha, K.; Kennedy, L.J.; Elanthamilan, E.; Merlin, J.P. Electrochemical studies on tamarindus indica fruit shell bio-waste derived nanoporous activated carbons for supercapacitor applications. *J. Nanosci.* **2019**, *19*(6), 3388-3397.
8. Mohammed, A.A.; Chen, C.; Zhu, Z. Low-cost, high-performance supercapacitor based on activated carbon electrode materials derived from baobab fruit shells. *J. Colloid Interface Sci.* **2019**, *538*, 308-319.
9. Ma Y: Comparison of Activated Carbons Prepared from Wheat Straw via  $ZnCl_2$  and KOH Activation. *Waste Biomass Valorization* **2016**, *8*, 549-559.
